# Supplementary material
Source: PubMed Central journal article supplement (PMC3684181)
Supplement: NIHMS467904-supplement-1.pdf [file NIHMS467904-supplement-1.pdf]

**Online Appendix 1** Recoding of scores with more than 10 categories for ADNI-EF

| Original EF Score    | <u>Categorization</u> |         |         |         |        |       |       |       |       |       |
|----------------------|-----------------------|---------|---------|---------|--------|-------|-------|-------|-------|-------|
|                      | 0                     | 1       | 2       | 3       | 4      | 5     | 6     | 7     | 8     | 9     |
| Category Fluency—    | 0–5                   | 6–7     | 8–9     | 10–12   | 13–16  | 17–20 | 21–23 | 24    | 25–27 | 28–60 |
| Animals              |                       |         |         |         |        |       |       |       |       |       |
| Category Fluency—    | 0–3                   | 4–5     | 6       | 7–8     | 9–11   | 12–14 | 15–17 | 18    | 19–20 | 21–31 |
| Vegetables           |                       |         |         |         |        |       |       |       |       |       |
| WAIS-R Digit Symbol  | 0–9                   | 10–15   | 16–19   | 20–29   | 30–38  | 39–46 | 47–53 | 54–56 | 57–61 | 62–87 |
| Digit Span Backwards | 1–2                   | 3       | 4       | 5       | 6      | 7     | 8     | 9     | 10    | 11–12 |
| Trails A             | 118–150               | 94–117  | 73–93   | 53–72   | 40–52  | 32–39 | 27–31 | 24–26 | 21–23 | 5–20  |
| Trails B             | 261–300               | 226–260 | 196–225 | 137–195 | 96–136 | 73–95 | 60–72 | 54–59 | 49–53 | 10–48 |
