# Supplementary material
Source: PubMed Central journal article supplement (PMC3684181)
Supplement: NIHMS467904-supplement-2.pdf [file NIHMS467904-supplement-2.pdf]

**Online Appendix 2** Standardized primary factor loadings, and fit indices for the single factor model, the final bi-factor model, and alternate bi-factor models

| Item                 | Methods factor and/or residual correlations included |                                               |       |                      |                           |
|----------------------|------------------------------------------------------|-----------------------------------------------|-------|----------------------|---------------------------|
|                      | None<br>(Single<br>Factor)                           | Clock, CF<br>(Final<br>Bifactor) <sup>a</sup> | Clock | Clock, CF,<br>Trails | Clock, CF,<br>digit tasks |
| CF—Animals           | .67                                                  | .59                                           | .68   | .60                  | .59                       |
| CF—Vegetables        | .68                                                  | .60                                           | .69   | .61                  | .60                       |
| Trails A             | .72                                                  | .74                                           | .73   | .70                  | .74                       |
| Trails B             | .83                                                  | .85                                           | .83   | .82                  | .85                       |
| Digit Span Backwards | .50                                                  | .51                                           | .51   | .52                  | .51                       |
| WAIS-R Digit Symbol  | .83                                                  | .85                                           | .84   | .87                  | .85                       |
| Clock Circle         | .43                                                  | .36                                           | .35   | .36                  | .36                       |
| Clock Symbol         | .53                                                  | .49                                           | .48   | .50                  | .49                       |
| Clock Number         | .53                                                  | .45                                           | .44   | .45                  | .45                       |
| Clock Hands          | .76                                                  | .65                                           | .64   | .66                  | .65                       |
| Clock Time           | .66                                                  | .61                                           | .60   | .61                  | .61                       |
| TLI                  | .918                                                 | .986                                          | .945  | .989                 | .986                      |
| CFA                  | .945                                                 | .990                                          | .960  | .992                 | .989                      |
| RMSEA                | .114                                                 | .049                                          | .097  | .044                 | .050                      |

CF= Category Fluency; CFI= Confirmatory fit index; TLI=Tucker Lewis Index; RMSEA= Root mean squared error of approximation.

a) Residual variances for the final bifactor model were CF-Animals .65, CF-Vegetables .64, Trails A .46, Trails B .28, Digit Span Backward .74, WAIS-R Digit Symbol .27, Clock Circle .71, Clock Symbol .65, Clock Number .46, Clock Hands .11, Clock Time .38.
